# Supplementary material for: Targeting dendritic cells with TLR-2 ligand–coated nanoparticles loaded with Mycobacterium tuberculosis epitope induce antituberculosis immunity
Source: PubMed Central journal article supplement (PMC9674924; doi:10.1016/j.jbc.2022.102596), 2022-10-15

# Supporting Figure 5A

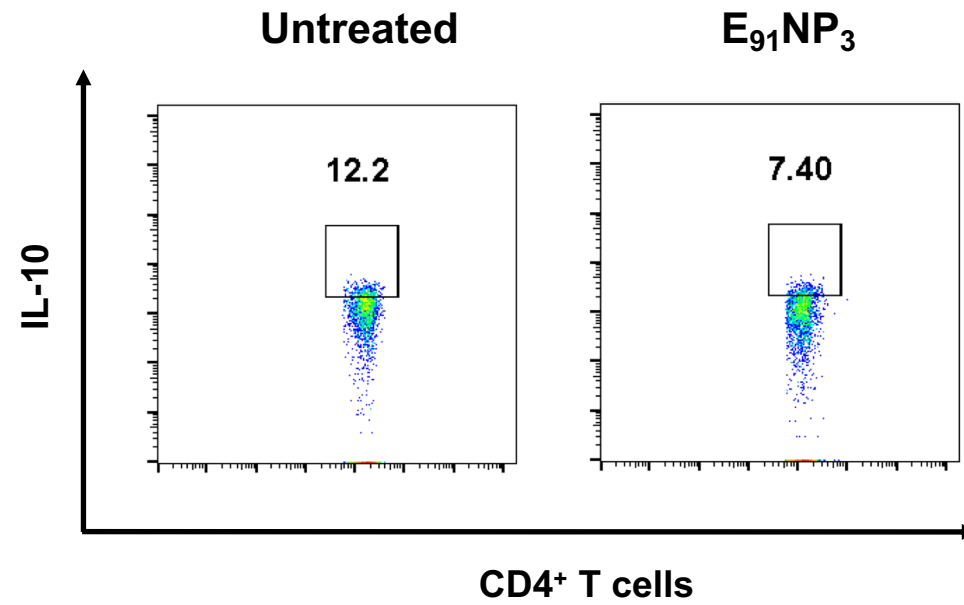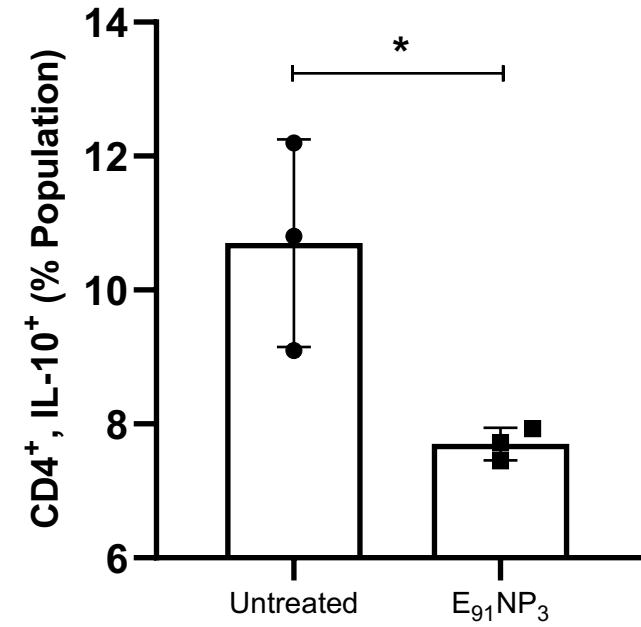

Supplement: mmc3.pdf [file mmc3.pdf]
